# Supplementary figures and images for: Size-dependent patterns of cell proliferation and migration in freely-expanding epithelia
Source: eLife journal article supplement (doi:10.7554/elife.58945), 2020-08-19

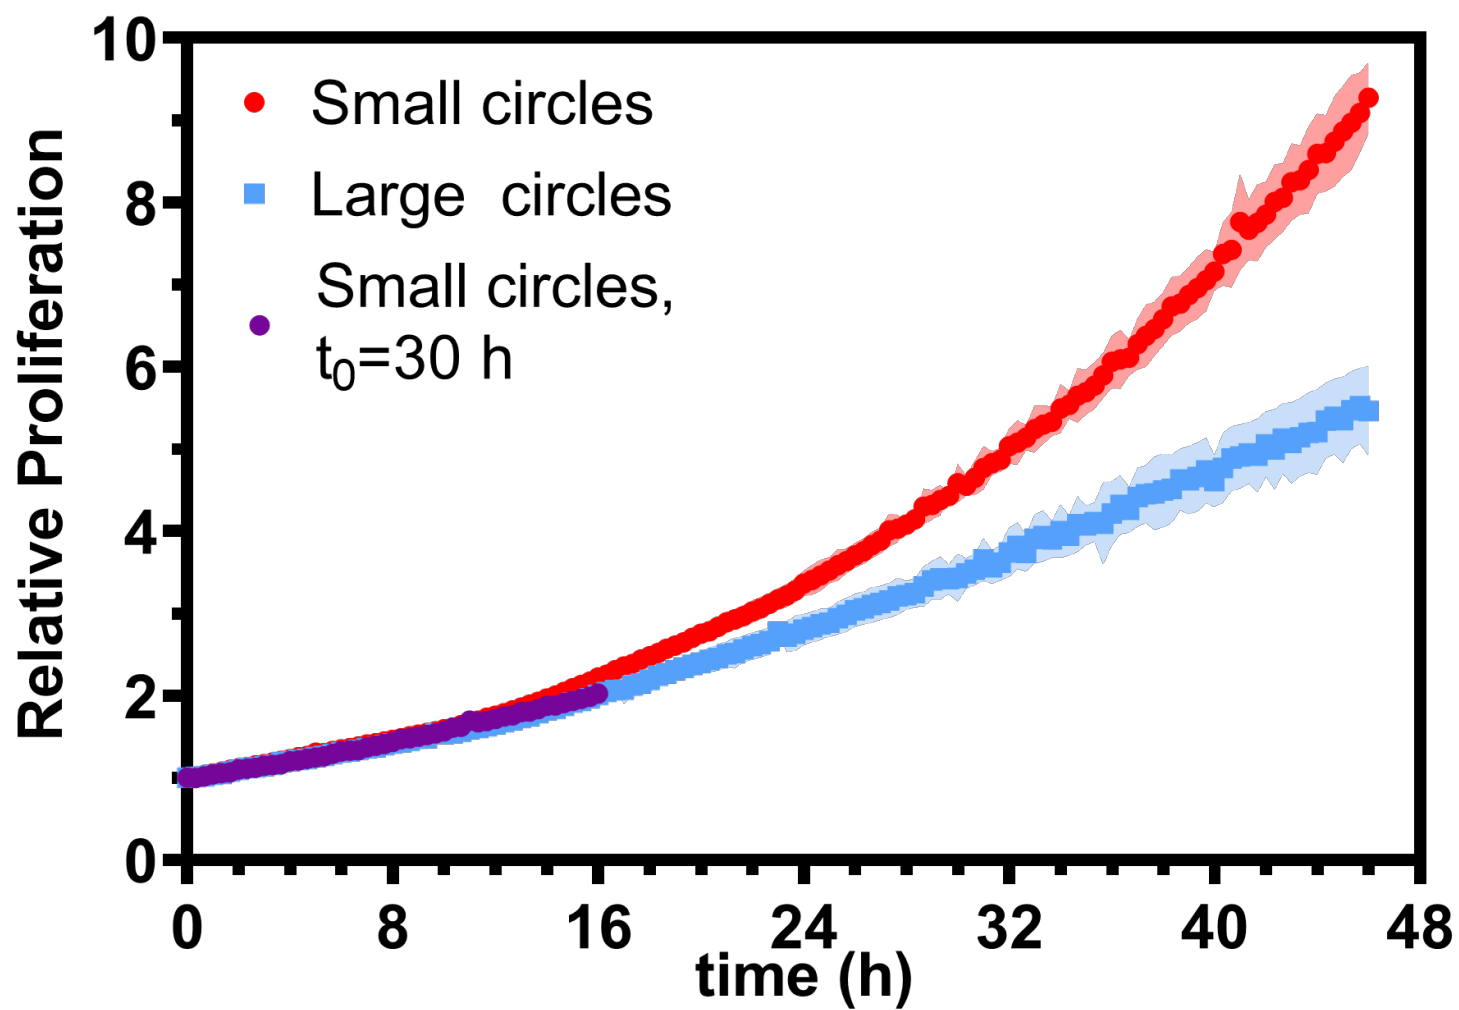

Supplement: supp [file elife_poa_e58945_Figure_1_figure_supplement_1.pdf › elife_poa_e58945_Figure_1_figure_supplement_1.pdf]

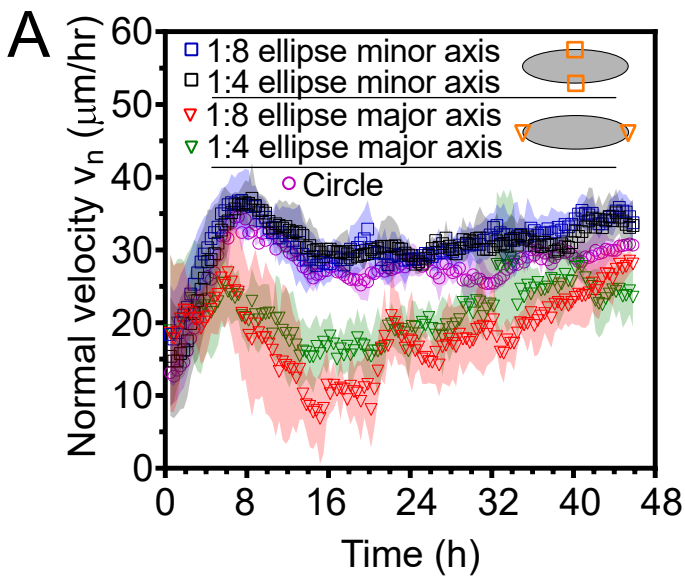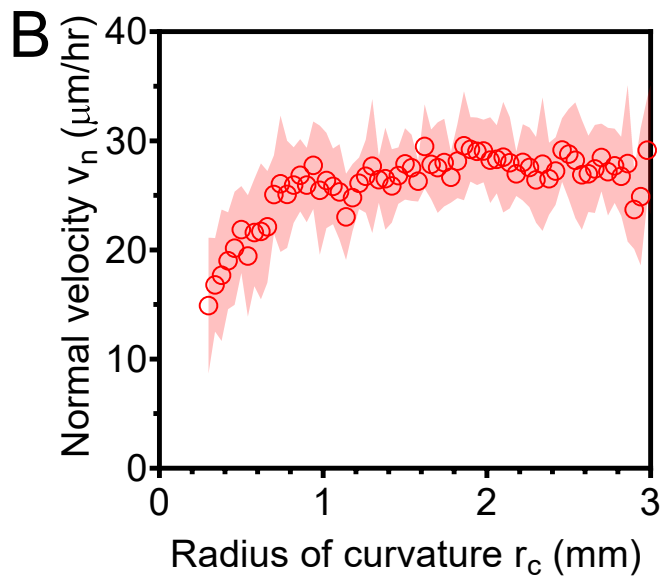

Supplement: supp [file elife_poa_e58945_Figure_1_figure_supplement_2.pdf › elife_poa_e58945_Figure_1_figure_supplement_2.pdf]

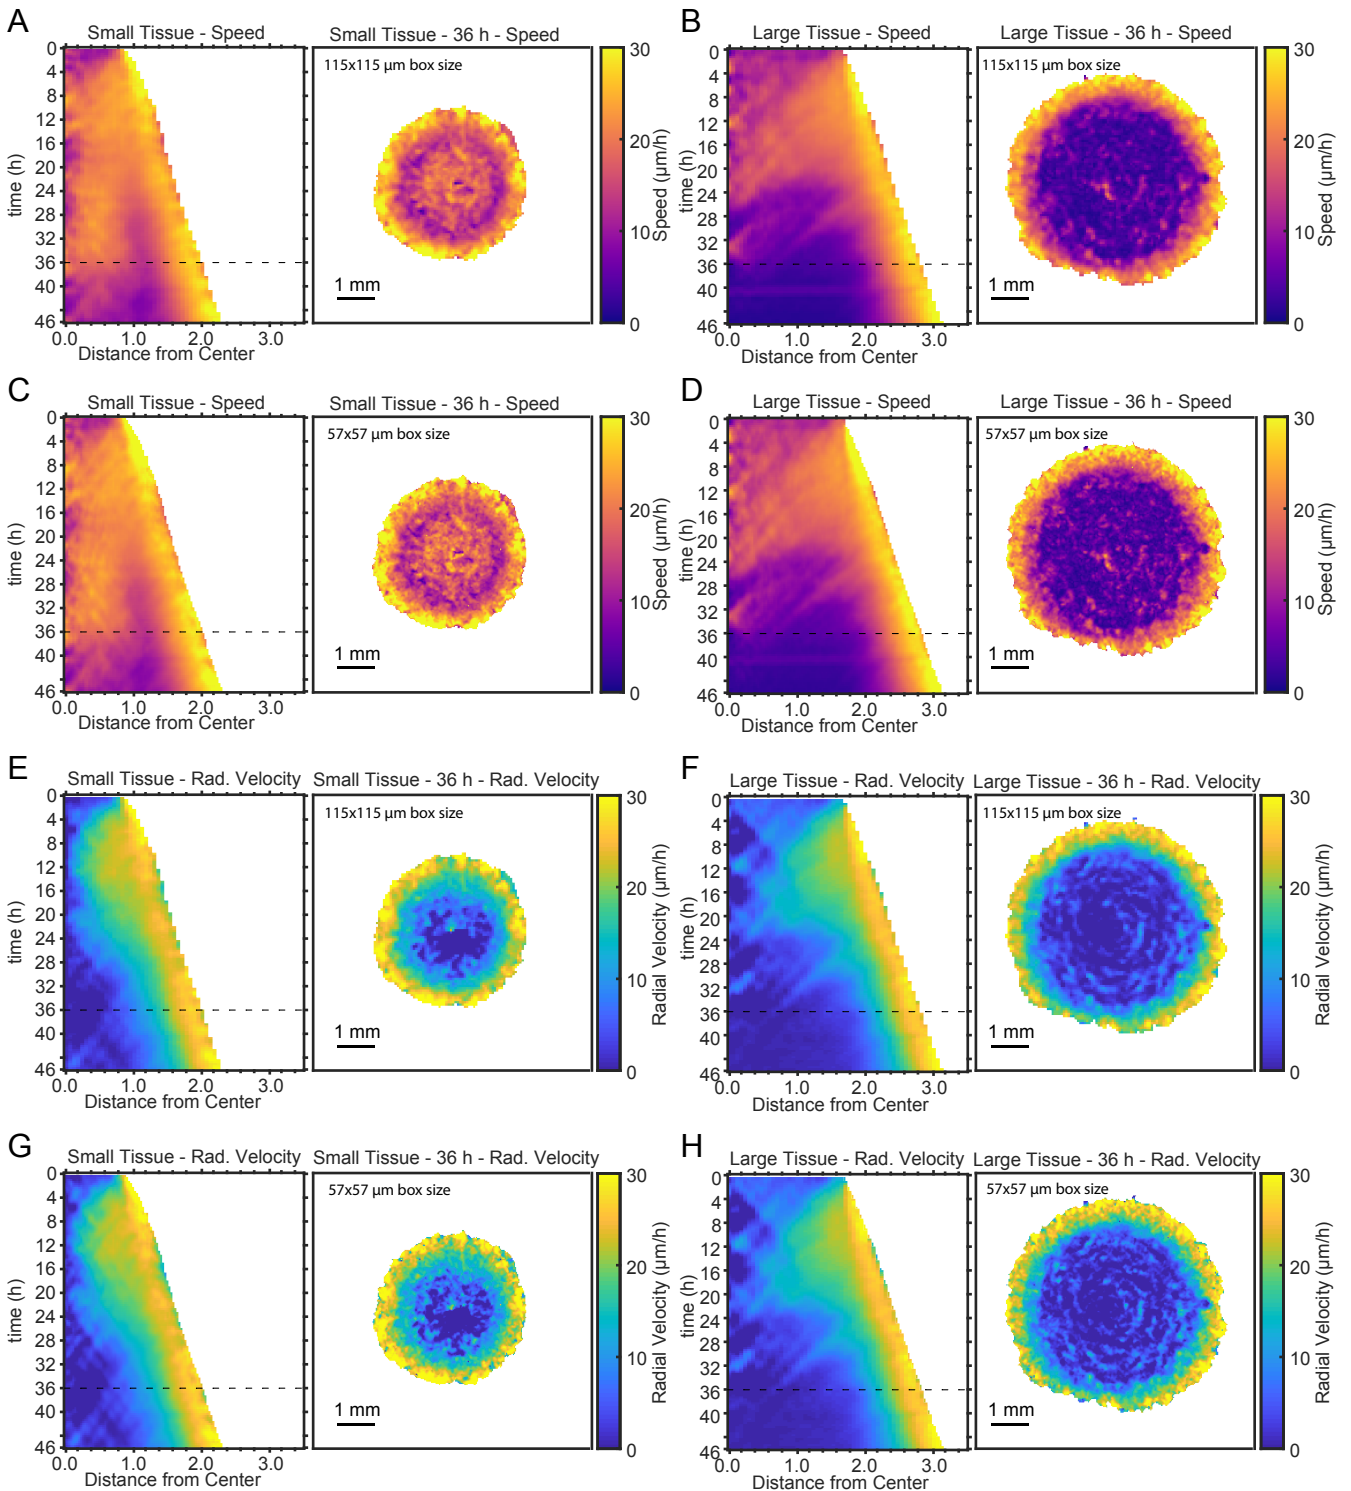

Supplement: supp [file elife_poa_e58945_Figure_2_figure_supplement_1.pdf › elife_poa_e58945_Figure_2_figure_supplement_1.pdf]

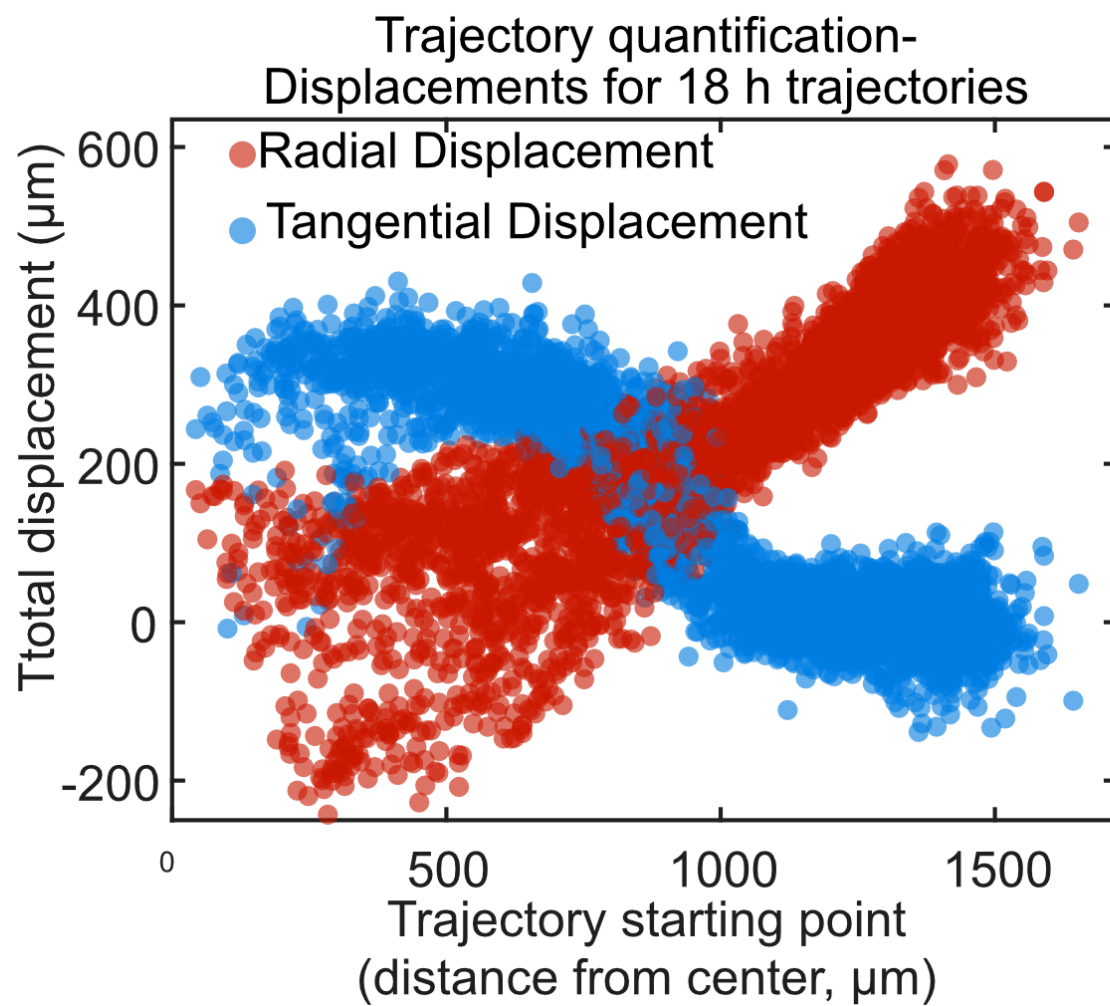

Supplement: supp [file elife_poa_e58945_Figure_3_figure_supplement_1.pdf › elife_poa_e58945_Figure_3_figure_supplement_1.pdf]

**A.**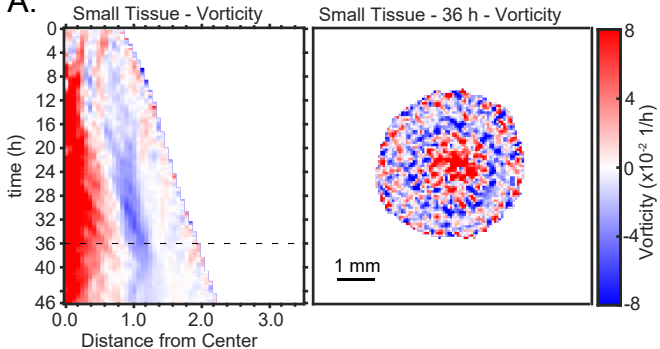**B.**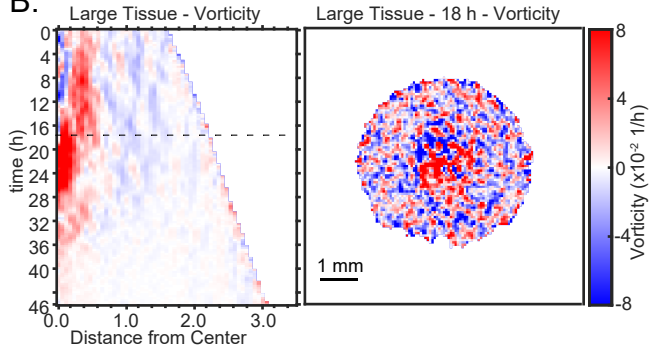

Supplement: supp [file elife_poa_e58945_Figure_3_figure_supplement_2.pdf › elife_poa_e58945_Figure_3_figure_supplement_2.pdf]

# Co-occurring low density and large vortices

A

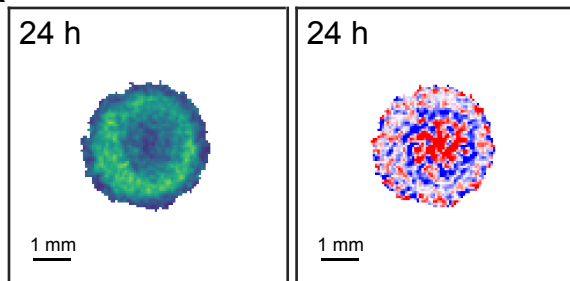

B

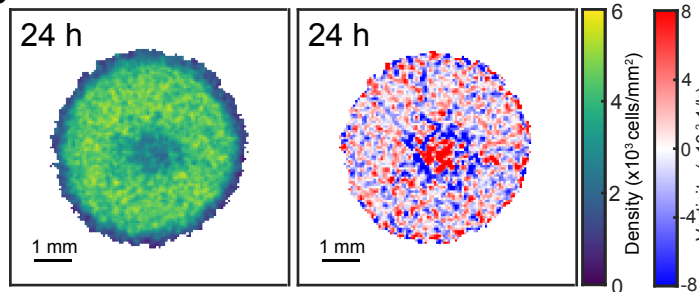

C

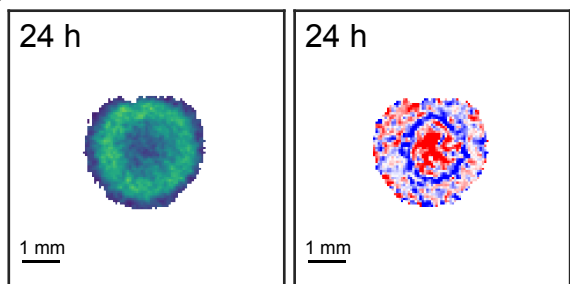

D

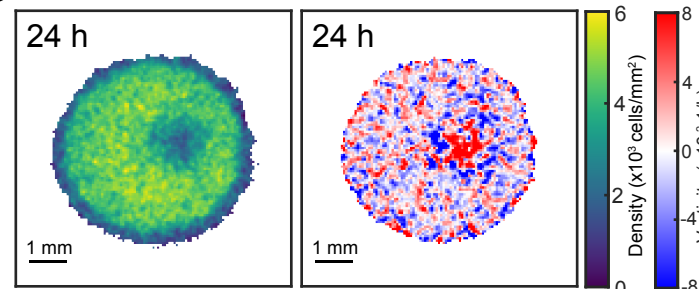

E

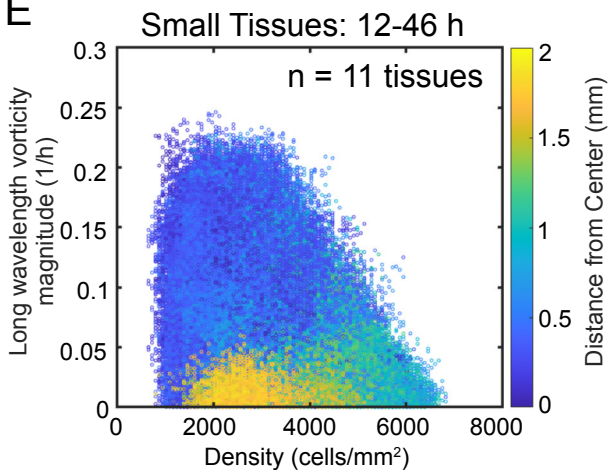

F

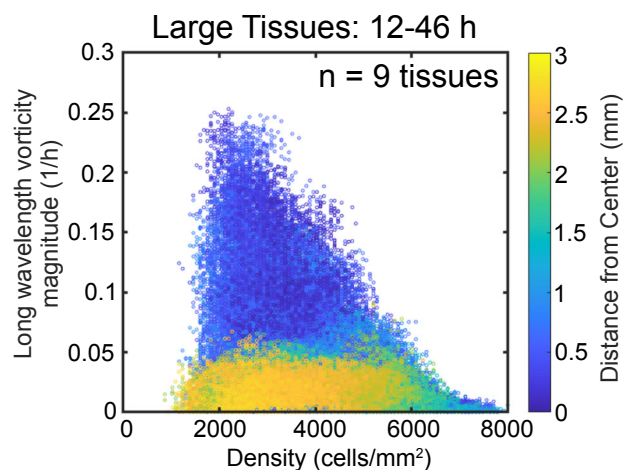

Supplement: supp [file elife_poa_e58945_Figure_4_figure_supplement_1.pdf › elife_poa_e58945_Figure_4_figure_supplement_1.pdf]

A

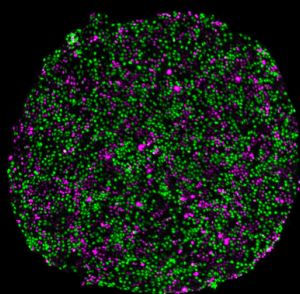

1 mm

0 h

B

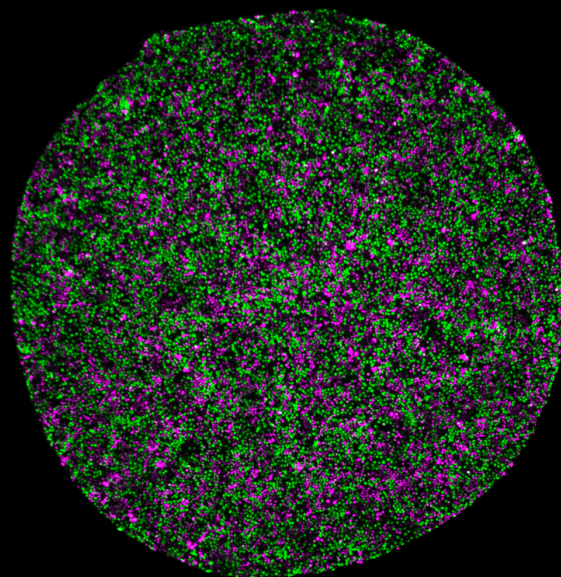

1 mm

0 h

Supplement: supp [file elife_poa_e58945_Figure_5_figure_supplement_1.pdf › elife_poa_e58945_Figure_5_figure_supplement_1.pdf]
